# Supplementary material for: Keratin-reinforced cellulose filaments from ionic liquid solutions
Source: Royal Society of Chemistry journal article supplement (doi:10.1039/c6ra20204g), 2016-01-01
Supplement: c6ra20204g1.pdf [file c6ra20204g1.pdf]

## SUPPORTING INFORMATION

### **Keratin-reinforced cellulose filaments from ionic liquid solutions**

Kari Kammiovirta<sup>a</sup>, Anna-Stiina Jääskeläinen<sup>a</sup>, Lauri Kuutti<sup>a</sup>, Ulla Holopainen-Mantila<sup>a</sup>, Arja Paananen<sup>a</sup>,  
Anna Suurnäkki<sup>a</sup>, Hannes Orelma<sup>a\*</sup>

<sup>a</sup>VTT, Technical Research Centre of Finland, Biologinkuja 7, Finland

\*Corresponding author: hannes.orelma@vtt.fi

### **Contents**

Feather keratin reinforced cellulose filaments by ionic liquid

|                                                                                                            |   |
|------------------------------------------------------------------------------------------------------------|---|
| 1.1. Fluorescence microscopy studies for investigating distribution of keratin in cellulose filaments..... | 2 |
| 1.2. Scanning Electron Microscopy imaging of cellulose-keratin filament .....                              | 3 |

## 1.1. Fluorescence microscopy studies for investigating distribution of keratin in cellulose filaments.

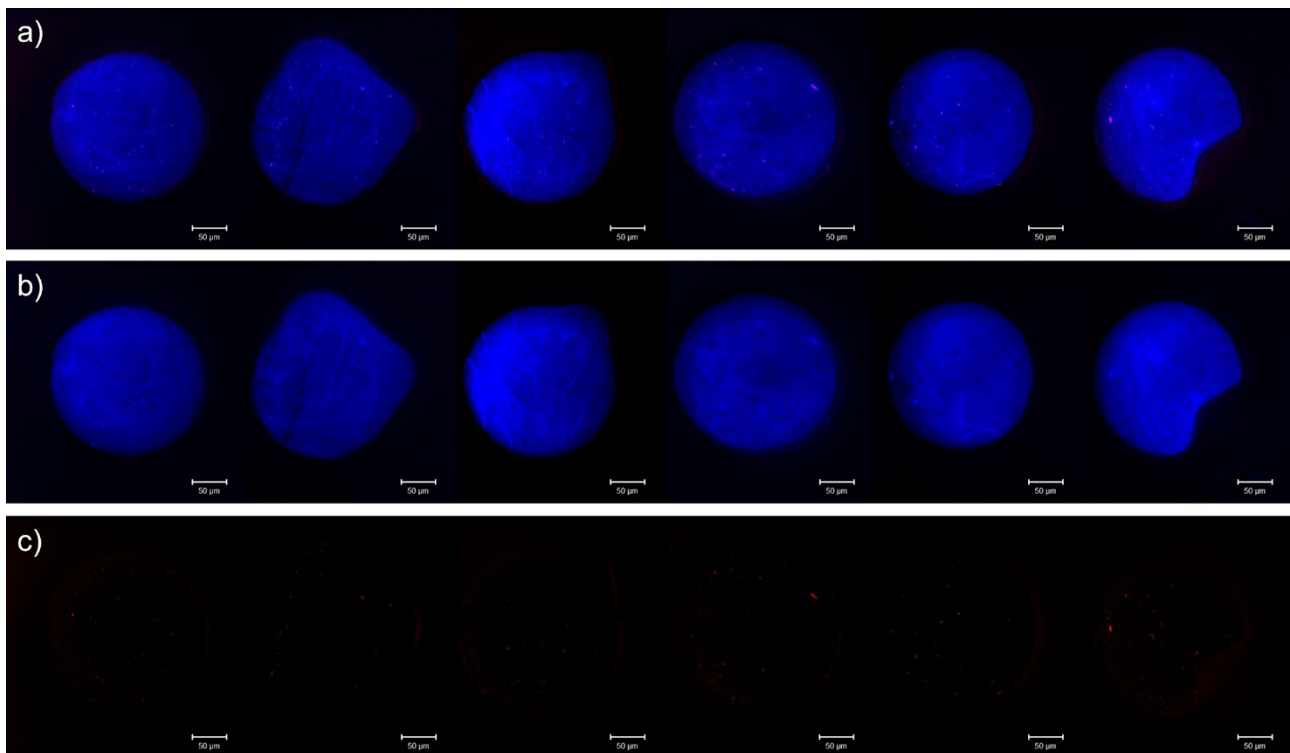

Figure S1. Replicate cross sections of the filament with 90% of cellulose stained with Calcofluor and Acid Fuchsin and imaged by CLSM for visualisation of cellulose and protein, respectively. Panel a) localisation of cellulose and protein by superimposition of the images, localisation of cellulose by Calcofluor panel b), and localisation of protein by Acid Fuchsin panel c).

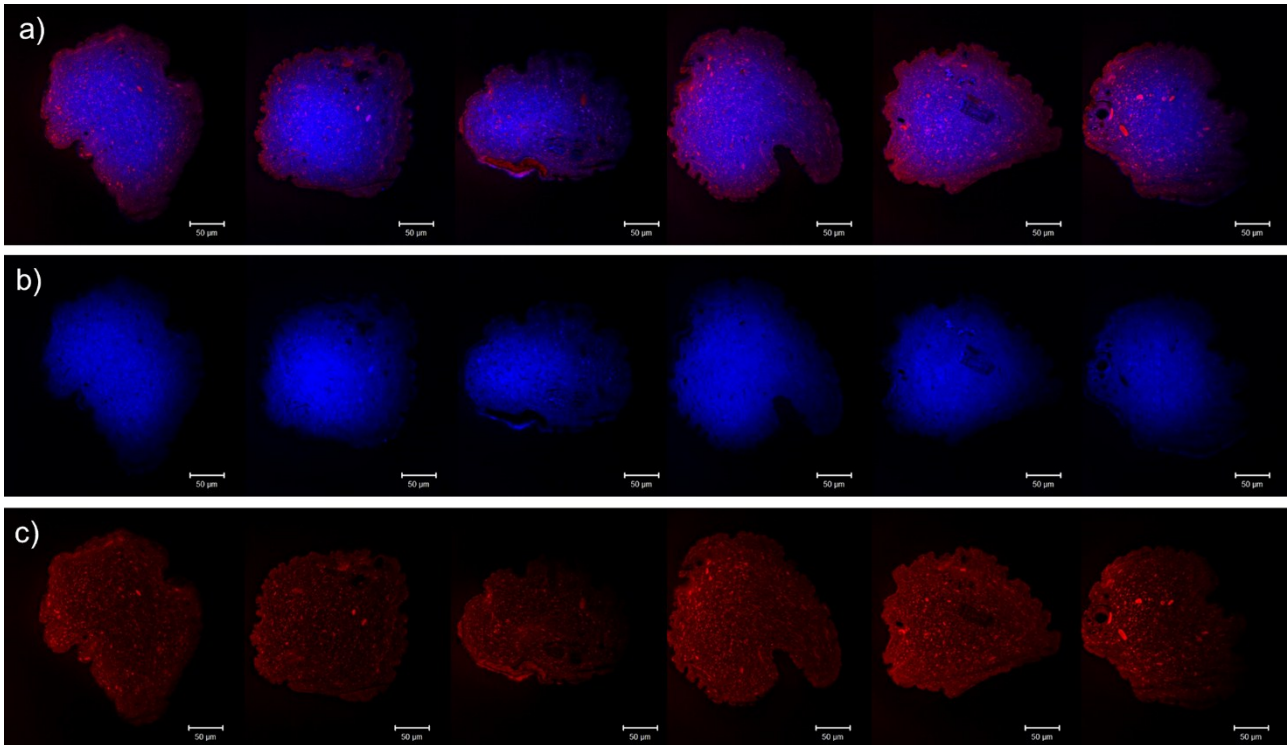

Figure S2. Replicate cross sections of the filament with 30% of cellulose stained with Calcofluor and Acid Fuchsin and imaged by CLSM for visualisation of cellulose and protein, respectively. Panel a) localisation of cellulose and protein by superimposition of the images, localisation of cellulose by Calcofluor panel b), and localisation of protein by Acid Fuchsin panel c).

## 1.2. Scanning Electron Microscopy imaging of 50:50 cellulose-keratin filament

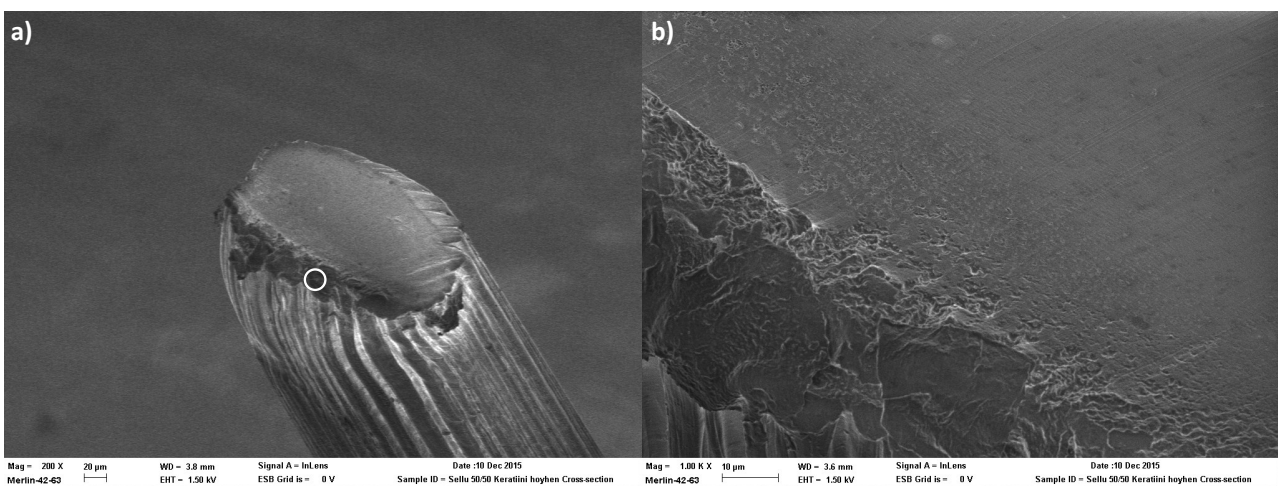

Figure S3. SEM image of the cross-section of the 50:50 cellulose keratin filament a). b) The higher magnification, recorded from the area (image left) shown by a white circle.
